# Supplementary material for: Implementation of Breastfeeding Policies at Workplace in Mexico: Analysis of Context Using a Realist Approach
Source: MDPI journal article supplement (doi:10.3390/ijerph19042315), 2022-02-17
Supplement: s1 [file s1]

Study participant sociodemographic characteristics, by city

| Characteristic                                                          | Chihuahua<br><i>n</i> =59 | Guadalajara<br><i>n</i> =16 | Mérida<br><i>n</i> =32 | Monterrey<br><i>n</i> =4 | Total<br><i>n</i> =111 |
|-------------------------------------------------------------------------|---------------------------|-----------------------------|------------------------|--------------------------|------------------------|
| <b>Type of interviewee (%)</b>                                          |                           |                             |                        |                          |                        |
| Beneficiaries or potential beneficiaries <sup>1</sup>                   | 30 (61.2)                 | 5 (10.2)                    | 14 (43.8)              | 0 (0.0)                  | 49 (44.2)              |
| Male employees                                                          | 20 (48.8)                 | 6 (14.6)                    | 13 (40.6)              | 2 (50.0)                 | 41 (36.9)              |
| Managers and human resources personnel <sup>2</sup>                     | 9 (42.9)                  | 5 (23.8)                    | 5 (15.6)               | 2 (50.0)                 | 21 (18.9)              |
| <b>Sex (%)</b>                                                          |                           |                             |                        |                          |                        |
| Female                                                                  | 34 (57.6)                 | 8 (50.0)                    | 20 (62.5)              | 1 (25.0)                 | 63 (56.8)              |
| Male                                                                    | 25 (42.4)                 | 8 (50.0)                    | 12 (37.5)              | 3 (75.0)                 | 48 (43.2)              |
| <b>Marital Status (%)</b>                                               |                           |                             |                        |                          |                        |
| Married/free union                                                      | 45 (76.3)                 | 14 (87.5)                   | 31 (96.9)              | 3 (75.0)                 | 93 (83.8)              |
| Single                                                                  | 12 (20.3)                 | 2 (12.5)                    | 0 (0.0)                | 1 (25.0)                 | 15 (13.5)              |
| Divorced                                                                | 2 (3.4)                   | 0 (0.0)                     | 1 (3.1)                | 0 (0.0)                  | 3 (2.7)                |
| <b>Education level (%)</b>                                              |                           |                             |                        |                          |                        |
| Lower secondary <sup>3</sup> or Upper secondary incomplete <sup>4</sup> | 5 (8.5)                   | 2 (12.5)                    | 2 (6.2)                | 0 (0.0)                  | 9 (8.1)                |
| Upper secondary complete <sup>4</sup>                                   | 0 (0.0)                   | 0 (0.0)                     | 11 (34.4)              | 0 (0.0)                  | 11 (9.9)               |
| Bachelor's degree                                                       | 38 (64.4)                 | 12 (75.0)                   | 16 (50.0)              | 1 (25.0)                 | 67 (60.4)              |
| Other <sup>5</sup>                                                      | 16 (27.1)                 | 2 (12.5)                    | 3 (9.4)                | 3 (75.0)                 | 24 (21.6)              |

<sup>1</sup> Female employees

<sup>2</sup> Includes Occupational Health staff, nurses, marketing managers and lactation promoters.

<sup>3</sup> Grades 7 to 9 and Technician incomplete

<sup>4</sup> Grades 10 to 12

<sup>5</sup> Includes Master's and Doctoral degrees.
