# Supplementary material for: Implementation of Breastfeeding Policies at Workplace in Mexico: Analysis of Context Using a Realist Approach
Source: Int J Environ Res Public Health. 2022 Feb 17;19(4):2315. doi: 10.3390/ijerph19042315 (PMC8872172; doi:10.3390/ijerph19042315)
Supplement: Supplementary file 1 [file ijerph-19-02315-s001.zip]

Archive with 5 entries (5 files):
- Supplementary Material S1.pdf
- Supplementary Material S2.pdf
- Supplementary Material S3.xlsx
- Supplementary Material S4.pdf
- Supplementary Material S5.pdf
