# Supplementary material for: Implementation of Breastfeeding Policies at Workplace in Mexico: Analysis of Context Using a Realist Approach
Source: Int J Environ Res Public Health. 2022 Feb 17;19(4):2315. doi: 10.3390/ijerph19042315 (PMC8872172; doi:10.3390/ijerph19042315)
Supplement: Supplementary file 1 [file ijerph-19-02315-s001.zip › Supplementary Material S3.xlsx]

## Sheet: Hoja1
Codebook - Implementation of breastfeeding policies at workplace in Mexico: Analysis of context using a realist approach
Subcategories in black are pre-determined (deductive) based in the Context-Mechanism-Outcome Framework of Breastfeeding Interventions at the Workplace // subcategories in blue are emergent (inductive)
CATEGORY	SUBCATEGORY	DEFINITION	EXAMPLE	INTERVIEW ID
Context	Flexibility work schedule / workload	Flexibility from work to take work breaks for breastfeeding or to milk extraction and reduced work hours when women return to work at the end of their maternity leave.	“... You have eight hours of work and for six months they give you half an hour, whether you take it before and after or you take it during the day. So, what I did was... I don't know if you know, but it is painful to have the milk, so I preferred to take my half hour in the lactation rooms than to leave or arrive later because it was very uncomfortable and painful for me to be waiting until I le…	Beneficiary or potential beneficiary, Guadalajara, [B01]
	Lactation services	Policies, interventions and/or actions to promote, protect and support breastfeeding at work.	“... Once they come off maternity leave, we are aware of when they return because at that time we contact them and talk to them about breastfeeding, we give them a talk on breastfeeding, benefits for them, for the baby, etc., and we provide follow-up, we explain to them what the breastfeeding period is and after that period, if they need more days, how should they request it, because they can req…	Manager and HR personnel, Mérida, [RRHH]
	Previous experience with BF	Previous breastfeeding experiences of the mother or partner, e.g. duration, barriers, facilitators, inclusion of formula or complementary foods, etc.	“...My mom, with my first baby. With my first baby I learned many things, my mom showed me, she bought me the breast pump, I mean, a woman's body is really wonderful because I didn't even have to fight to breastfeed, I always had enough milk, always, always, always, to this day. So, I was learning by myself and with, well, my mother's workplace. And now that my second baby was born, well, I was r…	Beneficiary or potential beneficiary, Chihuahua, [B04]
	Distance between workplace and infant	Barriers and facilitators related to the distance between the mother's work and the place where the baby stays during the mother's workday.	“...Well, I live a long way from here, so there was no way to go home. If I lived close it would be ideal, I would take my half hour, give her breast milk, come and go back, but unfortunately that's the way things are at work…”	Beneficiary or potential beneficiary, Mérida, [B02]
Mechanism	Awareness of the intervention	Actors' knowledge of policies, interventions and/or actions to promote, protect and support breastfeeding implemented in the workplace	“...At first we made it known by email, we put some pictures. A person was made responsible for keeping the register so that they could sign up, there is room for two so that they would know if there is space... space has not been a problem, I think [...] later on, with the Norm in place, we had to promote it even more, with the knowledge of the Norm to disseminate not only the existence of the l…	Manager and HR personnel, Guadalajara, [RRHH01]
	Usage of the intervention	Actors' usage of policies, interventions and/or actions to promote, protect and support breastfeeding implemented in the workplace.	“... I would think that about five women have used the lactation room more or less. This year there were literally about five, but because of Covid it has not been used [...] I had a nutritionist in my team and this year she got relief from her baby and was in quarantine, she wasn't able to use the lactation room either, the one who was able to use it was a previous employee I had and she did use…	Manager and HR personnel, Monterrey, [RRHH01]
Mechanism and Sub-Outcome	Workplace BF culture	Knowledge, ideas, traditions and customs that characterize the actors' workplace.	... No, no, not at all, because it is properly stipulated. In fact, we are certified by the Equality Norm where this certificate supports us, allows us to disseminate, to promote spaces and, above all, to raise awareness among managers that they should provide facilities for working mothers, since this is a right for children, so what we promote is the right to breastfeed their children…”	Manager and HR personnel, Guadalajara, [RRHH02]
	Physical environment	Barriers and facilitators related to the physical environment for working women to continue breastfeeding when they return to work at the end of their maternity leave.	“... In the last few years we had, I feel, more informed collaborators with more awareness who were really making an effort to continue breastfeeding for as long as possible [...] so we had a space that was assigned for the archive area and we were preparing it [...] but then it turned out that we had two or three mothers who were breastfeeding and that space was not enough. So we said "hey, it i…	Manager and HR personnel, Chihuahua, [RRHH]
	Supervisor support	Perception of supervisor support by women to allow them to continue breastfeeding when they return to work at the end of their maternity leave.	“...I think there is still a little bit of male chauvinism from the leaders, maybe. I think it's part of not recognizing that this is important for the well-being of their employees. I think it goes that way…”	Male employee, Guadalajara, [H02]
	Co-worker support	Perception of co-worker support by women to allow them to continue breastfeeding when they return to work at the end of their maternity leave.	“... since we have become familiar with the fact that it is something normal, we all accept the decision, if a colleague is at a work center, we support her or we can solve the details before she arrives. In the event that she has to leave early, we all try to do the work that will be done in the absence of this person…”	Male employee, Merida, [H03]
